# Supplementary material
Source: PubMed Central journal article supplement (PMC6057150)
Supplement: NIHMS981008-supplement-SI.pdf [file NIHMS981008-supplement-SI.pdf]

## Supporting Information

### Urinary Metabolites of Polycyclic Aromatic Hydrocarbons and their Association with Lipid Peroxidation: A Biomarker-Based Study between Los Angeles and Beijing

Yan Lin,<sup>1,2</sup> Xinghua Qiu,<sup>2\*</sup> Nu Yu<sup>1</sup>, Qiaoyun Yang<sup>2</sup>, Jesus Araujo<sup>3</sup> and Yifang Zhu<sup>1\*</sup>

1. Department of Environmental Health Sciences, Jonathan and Karin Fielding School of Public Health, University of California, Los Angeles, Los Angeles, California 90095, United States
2. State Key Joint Laboratory for Environmental Simulation and Pollution Control, College of Environmental Sciences and Engineering, and Center for Environment and Health, Peking University, Beijing 100871, P. R. China
3. Division of Cardiology, Department of Medicine, School of Medicine, University of California, Los Angeles, Los Angeles, California 90095, United States

\* Corresponding Authors: Yifang Zhu: [yifang@ucla.edu](mailto:yifang@ucla.edu)

Xinghua Qiu: [xhqi@pku.edu.cn](mailto:xhqi@pku.edu.cn)

## **Contents of this file**

**Table S1.** Information of OH-PAHs standards, the monitored ions of methylated OH-PAHs in GC-MS (EI) and the method detection limits of OH-PAHs.

**Table S2.** The influence of individual characteristic and physical activities on urinary OH-PAHs based on multivariate regression model with step-wise approach

**Table S3.** Comparison between the physical activities in Los Angeles and Beijing

**Table S4.** Descriptive statistics of biomarkers urine samples in Beijing (BJ) and Los Angeles before ( $LA_1$ ) and after the trip ( $LA_2$ )

**Table S5.** Pearson correlation among different OH-PAHs and metabolite ratios

**Table S6.** Summary of the studies cited to investigate the relationship between naphthalene exposure and 1-/2-OH-NAP ratio

**Figure S1.** Concentration of grouped urinary OH-PAHs.

**Figure S2.** Concentration of urinary 1-OH-PYR in the population around world

**Figure S3.** Comparison in 1+2/4-PHEs, OH-PHEs and time in secondhand smokes (SHS) among population in Los Angeles, in Beijing without SHS exposure and in Beijing with SHS

**Figure S4.** Correlation between MDA and OH-PAHs in both cities

**Figure S5.** Correlation between MDA and 1-OH-PYR in Los Angeles and Beijing

**Table S1. Information of OH-PAHs standards, the monitored ions of methylated OH-PAHs in GC-MS (EI) and the method detection limits of OH-PAHs**

| Compound                                                 | Abbreviation                           | Ions monitored | Detection Limits (pg mL <sup>-1</sup> ) | Purity            | Source                        |
|----------------------------------------------------------|----------------------------------------|----------------|-----------------------------------------|-------------------|-------------------------------|
| 1-hydroxynaphthalene                                     | 1-OH-NAP                               | 158, 159       | 14.9                                    | 98%               | Dr. Ehrenstrofer <sup>a</sup> |
| 2-hydroxynaphthalene                                     | 2-OH-NAP                               | 158, 159       | 13.6                                    | 99%               | Dr. Ehrenstrofer              |
| 2-hydroxybiphenyl                                        | 2-OH-BP                                | 184, 185       | 13.0                                    | 97.7%             | AccuStandard <sup>b</sup>     |
| 3-hydroxybiphenyl                                        | 3-OH-BP                                | 184, 185       | 8.6                                     | 100%              | AccuStandard                  |
| 4-hydroxybiphenyl                                        | 4-OH-BP                                | 184, 185       | 18.2                                    | 100%              | AccuStandard                  |
| 2,2'-dihydroxybiphenyl                                   | 2,2'-DOH-BP                            | 214, 215       | 11.9                                    | 100%              | AccuStandard                  |
| 3,4-dihydroxybiphenyl                                    | 3,4-DOH-BP                             | 214, 215       | 12.3                                    | 100%              | AccuStandard                  |
| 4,4'-dihydroxybiphenyl                                   | 4,4'-DOH-BP                            | 214, 215       | 9.7                                     | 100%              | AccuStandard                  |
| 2-hydroxydibenzofuran                                    | 2-OH-DBF                               | 198, 199       | 10.8                                    | 98.3%             | Chiron AS <sup>c</sup>        |
| 2-hydroxyfluorene                                        | 2-OH-FLU                               | 196, 197       | 7.5                                     | 98%               | Aldrich <sup>d</sup>          |
| 3-hydroxyfluorene                                        | 3-OH-FLU                               | 196, 197       | 12.3                                    | N.A. <sup>f</sup> | Aldrich                       |
| 1-hydroxyphenanthrene                                    | 1-OH-PHE                               | 208, 209       | 8.8                                     | 99%               | Dr. Ehrenstrofer              |
| 2-hydroxyphenanthrene                                    | 2-OH-PHE                               | 208, 209       | 17.0                                    | 99%               | Dr. Ehrenstrofer              |
| 3-hydroxyphenanthrene                                    | 3-OH-PHE                               | 208, 209       | 12.8                                    | 99%               | Dr. Ehrenstrofer              |
| 4-hydroxyphenanthrene                                    | 4-OH-PHE                               | 208, 209       | 9.9                                     | 99.6%             | Dr. Ehrenstrofer              |
| 1-hoxypyrene                                             | 1-OH-PYR                               | 217, 218       | 14.3                                    | 100%              | AccuStandard                  |
| (SS) <sup>13</sup> C <sub>6</sub> -3-hydroxyphenanthrene | <sup>13</sup> C <sub>6</sub> -3-OH-PHE | 214, 215       |                                         | ≥95%              | CIL <sup>e</sup>              |
| (IS) d <sub>10</sub> -anthracene                         | d <sub>10</sub> -ANT                   | 188, 189       |                                         | 99.2%             | AccuStandard                  |
| (IS) d <sub>10</sub> -pyrene                             | d <sub>10</sub> -PYR                   | 212, 213       |                                         | 99.1%             | AccuStandard                  |

<sup>a</sup>. Augsburg, Germany; <sup>b</sup>. New Haven, CT, USA; <sup>c</sup>. Trondheim, Norway; <sup>d</sup>. St. Louis, MO, USA;

<sup>e</sup>. Andover, MA, USA<sup>f</sup>. Notavailable.

**Table S2. The influence of individual characteristic and physical activities on urinary OH-PAHs based on multivariate regression model with step-wise approach**

| Pollutants <sup>a</sup> | Gender | Age   | BMI    | City   | CD <sup>b</sup> | BD <sup>c</sup> | BI <sup>d</sup> | BFI <sup>e</sup> | DD <sup>f</sup> | HD <sup>g</sup> | PD <sup>h</sup> | ED <sup>i</sup> |
|-------------------------|--------|-------|--------|--------|-----------------|-----------------|-----------------|------------------|-----------------|-----------------|-----------------|-----------------|
| 1-OH-NAP                | 0.6    | 0.61  | 0.15   | <0.001 | 0.89            | 0.29            | 0.21            | 0.39             | 0.24            | 0.61            | 0.07            | 0.43            |
| 2-OH-NAP                | <0.001 | 0.14  | 0.76   | 0.89   | 0.36            | 0.05            | 0.23            | 0.75             | 0.98            | 0.67            | <0.05           | <0.01           |
| 2-OH-BP                 | <0.05  | <0.05 | <0.05  | 0.11   | 0.51            | 0.93            | 0.34            | 0.91             | <0.05           | 0.34            | 0.28            | <0.05           |
| 4-OH-BP                 | 0.24   | 0.8   | 0.11   | <0.001 | 0.84            | 0.1             | 0.34            | 0.18             | 0.82            | 0.98            | 0.48            | 0.46            |
| 4,4'-DOH-BP             | 0.83   | 0.77  | <0.05  | <0.001 | 0.84            | 0.25            | 0.3             | 0.24             | 0.85            | 0.59            | 0.09            | <0.05           |
| 2-OH-DBF                | 0.24   | 0.62  | <0.001 | <0.001 | 0.34            | 0.15            | 0.48            | 0.22             | 0.92            | 0.44            | 0.76            | 0.08            |
| 2-OH-FLU                | 0.37   | 0.86  | <0.001 | <0.001 | 0.54            | 0.22            | 0.39            | 0.34             | 0.95            | 0.74            | 0.68            | 0.11            |
| 3-OH-FLU                | 0.84   | 1     | <0.001 | <0.001 | 0.48            | 0.26            | 0.25            | 0.31             | 0.51            | 0.37            | 0.14            | <0.05           |
| 1-OH-PHE                | 0.99   | <0.05 | <0.001 | <0.001 | 0.73            | 0.05            | 0.15            | 0.8              | 0.94            | 0.78            | 0.6             | 0.23            |
| 2-OH-PHE                | 0.09   | 0.78  | <0.05  | <0.001 | 0.82            | 0.32            | 0.66            | 0.53             | 0.69            | 0.81            | 0.43            | 0.38            |
| 4-OH-PHE                | 0.36   | 0.7   | 0.99   | <0.001 | 0.21            | 0.38            | 0.42            | 0.69             | 0.3             | 0.79            | 0.69            | 0.23            |
| 1-OH-PYR                | 0.48   | 0.33  | 0.26   | <0.001 | 0.58            | 0.27            | 0.51            | <0.05            | 0.55            | 0.46            | 0.95            | 0.23            |
| ΣOH-NAPs                | <0.05  | 0.34  | 0.4    | 0.11   | 0.86            | 0.22            | 0.24            | 0.85             | 0.34            | 0.07            | 0.41            | <0.05           |
| ΣOH-BPs                 | 0.54   | 0.09  | <0.01  | <0.001 | 0.9             | 0.27            | 0.7             | 0.41             | 0.09            | 0.11            | 0.64            | <0.01           |
| ΣOH-FLUs                | 0.85   | 0.14  | <0.001 | <0.001 | 0.13            | <0.05           | 0.07            | 0.28             | 0.66            | 0.41            | 0.32            | 0.09            |
| ΣOH-PHEs                | 0.84   | <0.05 | <0.01  | <0.001 | 0.18            | <0.05           | <0.05           | 0.43             | 0.64            | 0.56            | 0.75            | 0.32            |
| Σ <sub>8</sub> OH-PAHs  | <0.05  | 0.45  | 0.44   | <0.01  | 0.68            | 0.12            | 0.5             | 0.38             | 0.39            | 0.61            | 0.32            | 0.15            |
| Σ <sub>12</sub> OH-PAHs | <0.05  | 0.25  | 0.21   | <0.001 | 0.73            | 0.14            | 0.59            | 0.29             | 0.28            | 0.35            | 0.38            | <0.05           |

<sup>a</sup> Data was log-transformed before the analysis; <sup>b</sup> CD – Cooking duration (h); <sup>c</sup> BT – Barbecue duration (h); <sup>d</sup> BI – Barbecue intake (pound); <sup>e</sup> BFI – Baked food intake (pound); <sup>f</sup> DD – Driving duration (h); <sup>g</sup> HT – Duration near heavy traffic(h); <sup>h</sup> PD – Duration in public traffic transportation (h); <sup>i</sup> ED – Duration in environmental tobacco smoke (h).

**Table S3. Comparison between the physical activities in Los Angeles and Beijing**

|                                                | In Los Angeles<br>(n=57) | In Beijing<br>(n=47) | <i>p</i> -value <sup>a</sup> |
|------------------------------------------------|--------------------------|----------------------|------------------------------|
| Cooking Duration(h)                            | 0.86±0.99 <sup>b</sup>   | 0.00±0.02            | <b>&lt;0.01</b>              |
| Barbecue Duration (h)                          | 0.16±0.52                | 0.00±0.00            | <b>&lt;0.05</b>              |
| Barbecue intake (pound)                        | 0.23±0.48                | 0.26±0.59            | 0.73                         |
| Baked food intake (pound)                      | 0.54±0.78                | 0.66±0.56            | <b>&lt;0.05</b>              |
| Driving Duration (h)                           | 0.67±1.14                | 0.16±0.67            | <b>&lt;0.01</b>              |
| Duration near heavy traffic                    | 0.62±0.99                | 4.03±3.49            | <b>&lt;0.01</b>              |
| Duration in public transportation (h)          | 0.58±1.21                | 3.00±4.18            | <b>&lt;0.01</b>              |
| Duration in environmental tobacco<br>smoke (h) | 0.02±0.09                | 1.49±2.39            | <b>&lt;0.01</b>              |

a. Mann-Whitney U-test, two-tailed

b. Mean±standard deviation

**Table S4 Descriptive statistics of biomarkers urine samples in Beijing (BJ) and Los Angeles before (LA<sub>1</sub>) and after the trip(LA<sub>2</sub>)**

| Biomarker                                      | Median (IQR <sup>a</sup> ) |                   |                           | p-value <sup>b</sup>   |                        |                                     | Beijing/LA Ratio(95%CI;p-value) <sup>c</sup> |
|------------------------------------------------|----------------------------|-------------------|---------------------------|------------------------|------------------------|-------------------------------------|----------------------------------------------|
|                                                | In LA <sub>1</sub> (n=30)  | In BJ(n=47)       | In LA <sub>2</sub> (n=27) | LA <sub>1</sub> vs. BJ | LA <sub>2</sub> vs. BJ | LA <sub>1</sub> vs. LA <sub>2</sub> |                                              |
| <b>Exposure biomarker (ng/mL)</b>              |                            |                   |                           |                        |                        |                                     |                                              |
| 1-hydroxynaphthalene                           | 0.86 (0.15, 1.81)          | 2.37 (0.95, 4.40) | 0.51 (0.16, 1.09)         | <0.001                 | <0.001                 | 0.51                                | 4.1 (2.3-7.3; <0.001)                        |
| 2-hydroxynaphthalene                           | 1.92 (0.78, 5.69)          | 5.20 (2.08, 6.46) | 2.57 (0.80, 5.52)         | <0.05                  | <0.05                  | 0.79                                | 1.7 (1.1-2.6; <0.05)                         |
| ∑hydroxynaphthalenes                           | 3.47 (1.08, 8.53)          | 6.95 (3.78, 13.1) | 2.95 (0.89, 7.30)         | <0.01                  | <0.01                  | 1.00                                | 2.1 (1.3-3.2; <0.01)                         |
| 2-hydroxybiphenyl                              | 0.44 (0.28, 0.66)          | 0.53 (0.39, 1.22) | 0.64 (0.46, 0.94)         | <0.05                  | 0.84                   | <0.05                               | 1.7 (1.1-2.5; <0.05)                         |
| 4-hydroxybiphenyl                              | 0.24 (0.13, 0.39)          | 1.65 (0.88, 3.32) | 0.25 (0.09, 0.67)         | <0.001                 | <0.001                 | 0.73                                | 5.8 (3.8-8.7; <0.001)                        |
| 4,4'-dihydroxybiphenyl                         | 0.27 (0.12, 0.56)          | 1.44 (0.65, 2.43) | 0.41 (0.07, 0.70)         | <0.001                 | <0.001                 | 0.61                                | 4.2 (2.7-6.7; <0.001)                        |
| ∑hydroxybiphenyls                              | 1.04 (0.55, 1.72)          | 3.77 (2.17, 6.75) | 1.34 (0.74, 2.98)         | <0.001                 | <0.001                 | 0.14                                | 3.6 (2.4-5.2; <0.001)                        |
| 2-hydroxydibenzofuran                          | 0.18 (0.10, 0.37)          | 2.19 (1.33, 4.53) | 0.30 (0.12, 0.58)         | <0.001                 | <0.001                 | 0.31                                | 9.5 (6.5-13.7; <0.001)                       |
| 2-hydroxyfluorene                              | 0.14 (0.09, 0.29)          | 1.75 (0.80, 2.97) | 0.26 (0.09, 0.43)         | <0.001                 | <0.001                 | 0.39                                | 9.0 (6.1-13.3; <0.001)                       |
| 3-hydroxyfluorene                              | 0.06 (0.04, 0.09)          | 0.57 (0.33, 1.08) | 0.07 (0.02, 0.15)         | <0.001                 | <0.001                 | 0.64                                | 8.6 (5.6-13.2; <0.001)                       |
| ∑hydroxyfluorenes                              | 0.21 (0.13, 0.40)          | 2.24 (1.12, 4.02) | 0.28 (0.11, 0.58)         | <0.001                 | <0.001                 | 0.41                                | 8.8 (6.0-13.0; <0.001)                       |
| 1-hydroxyphenanthrene                          | 0.08 (0.05, 0.24)          | 0.70 (0.30, 1.09) | 0.11 (0.05, 0.23)         | <0.001                 | <0.001                 | 0.97                                | 6.1 (4.0-9.3; <0.001)                        |
| 2-hydroxyphenanthrene                          | 0.05 (0.03, 0.11)          | 0.35 (0.21, 0.56) | 0.07 (0.03, 0.10)         | <0.001                 | <0.001                 | 0.74                                | 5.5(3.9-7.7; <0.001)                         |
| 4-hydroxyphenanthrene                          | 0.04 (0.01, 0.08)          | 0.18 (0.07, 0.29) | 0.05 (0.02, 0.10)         | <0.001                 | <0.001                 | 0.53                                | 4.2 (2.7-6.6; <0.001)                        |
| ∑hydroxyphenanthrenes                          | 0.19 (0.10, 0.47)          | 1.26 (0.49, 2.04) | 0.28 (0.09, 0.49)         | <0.001                 | <0.001                 | 0.82                                | 5.4 (3.7-7.9; <0.001)                        |
| 1-hydroxypyrene                                | 0.06 (0.03, 0.13)          | 0.51 (0.16, 0.94) | 0.09 (0.04, 0.18)         | <0.001                 | <0.001                 | 0.52                                | 5.2 (3.3-8.2; <0.001)                        |
| ∑ <sub>8</sub> hydroxylated PAHs <sup>d</sup>  | 4.05 (1.27, 8.76)          | 11.6 (5.89, 20.9) | 3.43 (1.20, 8.27)         | <0.001                 | <0.001                 | 0.89                                | 2.8(1.8-4.2; <0.001)                         |
| ∑ <sub>12</sub> hydroxylated PAHs <sup>e</sup> | 5.51 (2.17, 10.4)          | 18.1 (10.3, 33.7) | 6.58 (2.04, 11.1)         | <0.001                 | <0.001                 | 0.51                                | 3.2 (2.2-4.7; <0.001)                        |
| <b>Effect biomarker (ng/mL)</b>                |                            |                   |                           |                        |                        |                                     |                                              |
| malondialdehyde                                | 27.9 (14.3, 52.3)          | 49.4 (20.2, 92.4) | 36.1 (16.1, 62.8)         | <0.05                  | 0.25                   | 0.24                                | 1.5 (1.0-2.0; <0.05)                         |

<sup>a</sup>. IQR: interquartile range; <sup>b</sup>. Mann-Whitney test; <sup>c</sup>. Calculated by multivariate linear regression models with enter approach, adjusted by age, gender and BMI;

<sup>d</sup>. Sum of OH-NAPs, OH-FLUs, OH-PHEs, and 1-OH-PYR; <sup>e</sup>.Sum of OH-PAHs, OH-BPs, and 2-OH-DBF

**Table S5. Pearson correlation among different OH-PAHs and metabolite ratios (data was log-transformed)**

|             | ΣOH-BPs | 2-OH-DBF | ΣOH-FLUs | ΣOH-PHEs | 1-OH-PYR | 1-/2-OH-NAP | 1+2-/4-OHPHE |
|-------------|---------|----------|----------|----------|----------|-------------|--------------|
| ΣOH-NAPs    | 0.56**  | 0.52**   | 0.57**   | 0.58**   | 0.58**   | -0.13       | -0.01        |
| ΣOH-BPs     |         | 0.77**   | 0.76**   | 0.77**   | 0.68**   | 0.20*       | 0.11         |
| 2-OH-DBF    |         |          | 0.97**   | 0.91**   | 0.83**   | 0.33**      | 0.19*        |
| ΣOH-FLUs    |         |          |          | 0.93**   | 0.86**   | 0.34**      | 0.22*        |
| ΣOH-PHEs    |         |          |          |          | 0.86**   | 0.30**      | 0.15         |
| 1-OH-PYR    |         |          |          |          |          | 0.26**      | 0.14         |
| 1-/2-OH-NAP |         |          |          |          |          |             | 0.11         |

\*\*: $p < 0.01$ ; \*: $p < 0.05$

**Table S6. Summary of the studies cited to investigate the relationship between naphthalene exposure and 1-/2-OH-NAP ratio**

| No.    | Exposure characteristic | Population description                               | Sample size | Male/Female      | Smokers/No n-smokers | ΣOH-NAPs (µg/g creatinine) | 1-/2-OH -NAP | Ref. |
|--------|-------------------------|------------------------------------------------------|-------------|------------------|----------------------|----------------------------|--------------|------|
| Study1 | Biomass burning         | Cooking women (pre-intervention)                     | 47          | 0/47             | 0/47                 | 34.2                       | 1.30         | 15   |
|        |                         | Cooking women (post-intervention)                    | 47          | 0/47             | 0/47                 | 20.3                       | 0.97         | 15   |
| Study2 | Biomass burning         | Cooking women (pre-intervention)                     | 57          | 0/57             | 0/57                 | 39.0                       | 1.04         | 16   |
|        |                         | Cooking women (post-intervention)                    | 57          | 0/57             | 0/57                 | 19.6                       | 0.96         | 16   |
| Study3 | Coking processes        | Tar distillation operators                           | 69          | N/A <sup>a</sup> | 56/13                | 1220                       | 2.62         | 17   |
|        |                         | Naphthalene oil distillation workers                 | 33          | N/A              | 33/0                 | 1079                       | 1.84         | 17   |
|        |                         | Unexposed workers                                    | 36          | 25/11            | 28/8                 | 15.8                       | 1.70         | 17   |
| Study4 | Bitumen vapor           | bitumen-exposed workers(pre+post shift)              | 112         | 112/0            | 0/112                | 4.38                       | 0.77         | 18   |
|        |                         | Roadside construction workers(pre+post shift)        | 240         | 240/0            | 0/240                | 5.82                       | 0.60         | 18   |
| Study5 | Ambient environment     | Healthy people visiting a certain hospital           | 273         | 273/0            | 140/133              | 5.60                       | 0.55         | 1    |
| Study6 | Coking processes        | Works in distillation department                     | 29          | 29/0             | N/A                  | 2204                       | 1.75         | 19   |
|        |                         | Sorting department gas fitting operators             | 11          | 11/0             | N/A                  | 677                        | 1.89         | 19   |
| Study7 | Aluminum plant          | Resident within 1km from the plant (Sep. 14, 2005)   | 65          | N/A              | 0/65                 | 4.65                       | 0.92         | 20   |
|        |                         | Resident within 1km from the plant (Sep. 21, 2005)   | 68          | N/A              | 0/68                 | 4.05                       | 0.62         | 20   |
|        |                         | Resident within 1km from the plant (May 23+24, 2006) | 109         | N/A              | 0/109                | 4.22                       | 0.40         | 20   |
|        |                         | Resident within 1km from the plant (May 30+31, 2006) | 111         | N/A              | 0/111                | 3.81                       | 0.31         | 20   |



**Table S6. Summary of the studies cited to investigate the relationship between naphthalene exposure and 1-/2-OH-NAP ratio (continued)**

|         |                             |                                                                        |     |       |       |      |      |    |
|---------|-----------------------------|------------------------------------------------------------------------|-----|-------|-------|------|------|----|
|         |                             | Resident living more than 11km from the plant (Sep. 14, 2005)          | 62  | N/A   | 0/62  | 3.14 | 0.80 | 20 |
|         |                             | Resident living more than 11km from the plant (Sep. 21, 2005)          | 66  | N/A   | 0/66  | 4.31 | 0.57 | 20 |
|         |                             | Resident living more than 11km from the plant (May 23+24, 2006)        | 106 | N/A   | 0/106 | 4.20 | 0.46 | 20 |
|         |                             | Resident living more than 11km from the plant (May 30+31, 2006)        | 112 | N/A   | 0/112 | 4.38 | 0.50 | 20 |
| Study8  | Coking processes            | Workers at adjacement workplaces of coken ovens                        | 118 | 118/0 | 0/118 | 12.8 | 1.23 | 21 |
|         |                             | Workers at bottom of coken ovens                                       | 169 | 169/0 | 0/169 | 16.9 | 1.41 | 21 |
|         |                             | Workers at side of coken ovens                                         | 82  | 82/0  | 0/82  | 25.1 | 1.15 | 21 |
|         |                             | Workers at top of coken ovens                                          | 20  | 20/0  | 0/20  | 45.6 | 1.32 | 21 |
| Study9  | Creosote impregnation plant | Residence living at 50-360 m downwind from the plant(morning+evening)  | 57  | N/A   | 0/57  | 3.15 | 1.08 | 22 |
|         |                             | Residence living at 0.75-1.1 km upwind from the plant(morning+evening) | 51  | N/A   | 0/51  | 5.23 | 1.28 | 22 |
| Study10 | Traffic emission            | Schoolchildren near a road                                             | 64  | 38/26 | 0/64  | 6.81 | 0.41 | 23 |
| Study11 | Brick kiln                  | Brick kiln workers                                                     | 46  | 46/0  | 0/46  | 6.60 | 2.39 | 24 |
|         |                             | Non-exposed group                                                      | 34  | 34/0  | 0/46  | 1.66 | 0.97 | 24 |
| Study12 | Jet fuel                    | Workers with low exposure(pre+post shift)                              | 172 | N/A   | 0/172 | 2.95 | 0.41 | 25 |
|         |                             | Workers with high exposure(pre+post shift)                             | 141 | N/A   | 0/141 | 4.98 | 0.57 | 25 |

<sup>a.</sup> not available

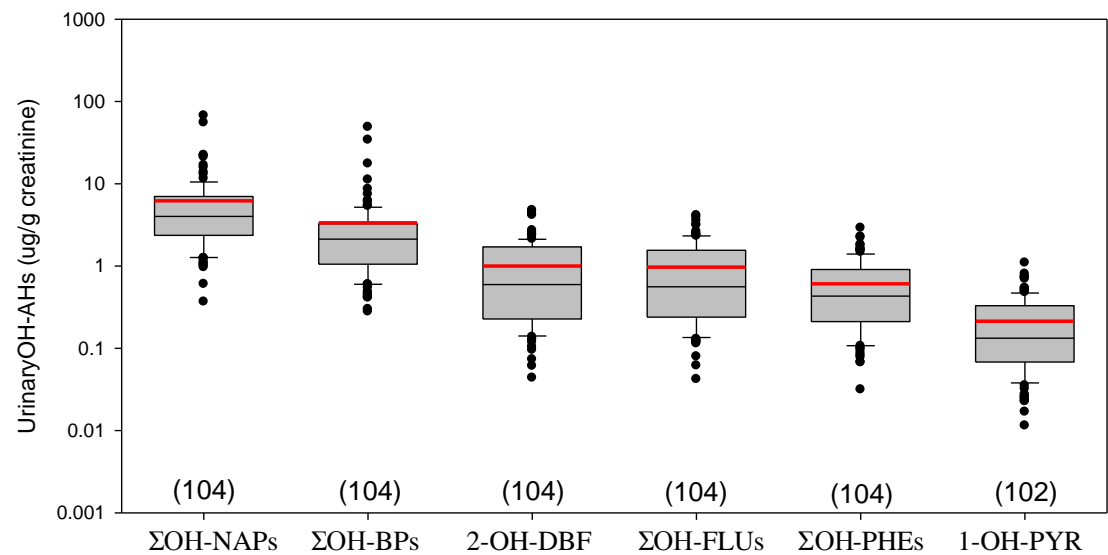

**Figure S1. Concentration of grouped urinary OH-PAHs.** The *solid horizontal line* represents the median, and the *red horizontal line* represents the mean. The *box* represents the 25th–75th percentiles, and the *whiskers* represent the 10th–90th percentiles. *Numbers in parentheses* are the number of detections.

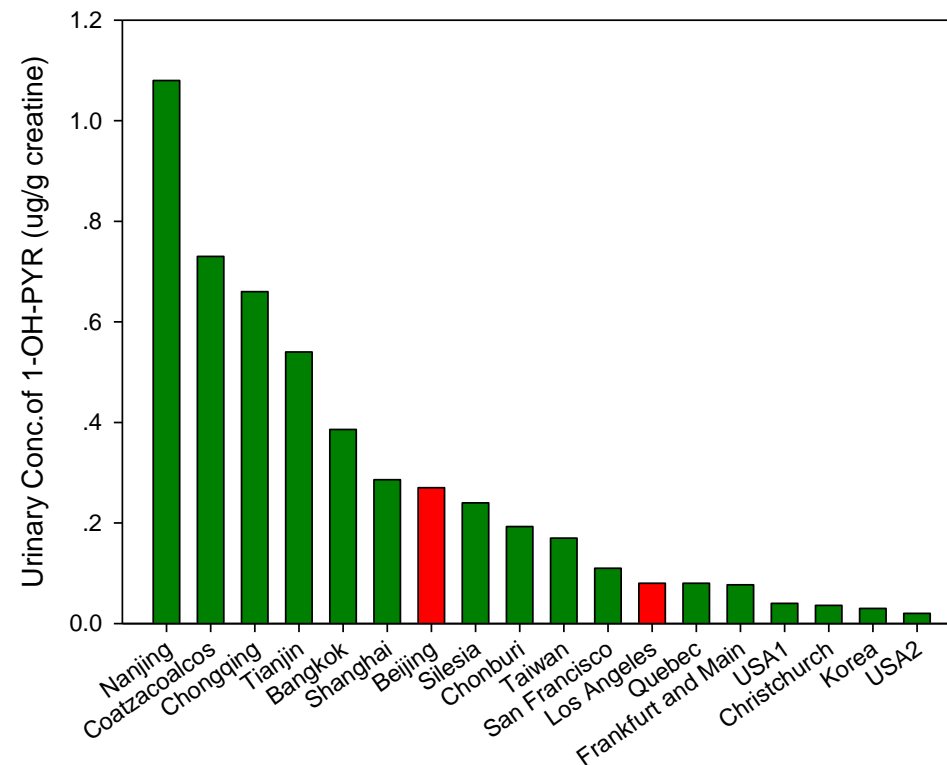

**Figure S2. Concentration of urinary 1-OH-PYR in the population around world.** Red bars are results from this study. Nanjing: 273 male adults;<sup>1</sup>Coatzacoalcos: 82 school children;<sup>2</sup>Chongqing: 343 male adult;<sup>3</sup>Tianjin: 116 adults in rural sites;<sup>4</sup> Bangkok: 105 schoolchildren;<sup>5</sup>Shanghai: 343 female adults;<sup>6</sup>Silesia: 108 non-smokers;<sup>7</sup>Chonburi: 61 schoolchildren;<sup>5</sup>Taiwan: 93 indoor officers;<sup>8</sup> San Francisco: 76 non-smokers;<sup>7</sup>Quebec:140 adults;<sup>9</sup>Frankfurt and Main: 289 non-smokers with age>20;<sup>10</sup> USA1: 1309 people with age>20;<sup>11</sup> Korea: 129 male university students;<sup>12</sup> Christchurch: 89 male students;<sup>13</sup> USA2: 1625 people with age>20.<sup>14</sup>

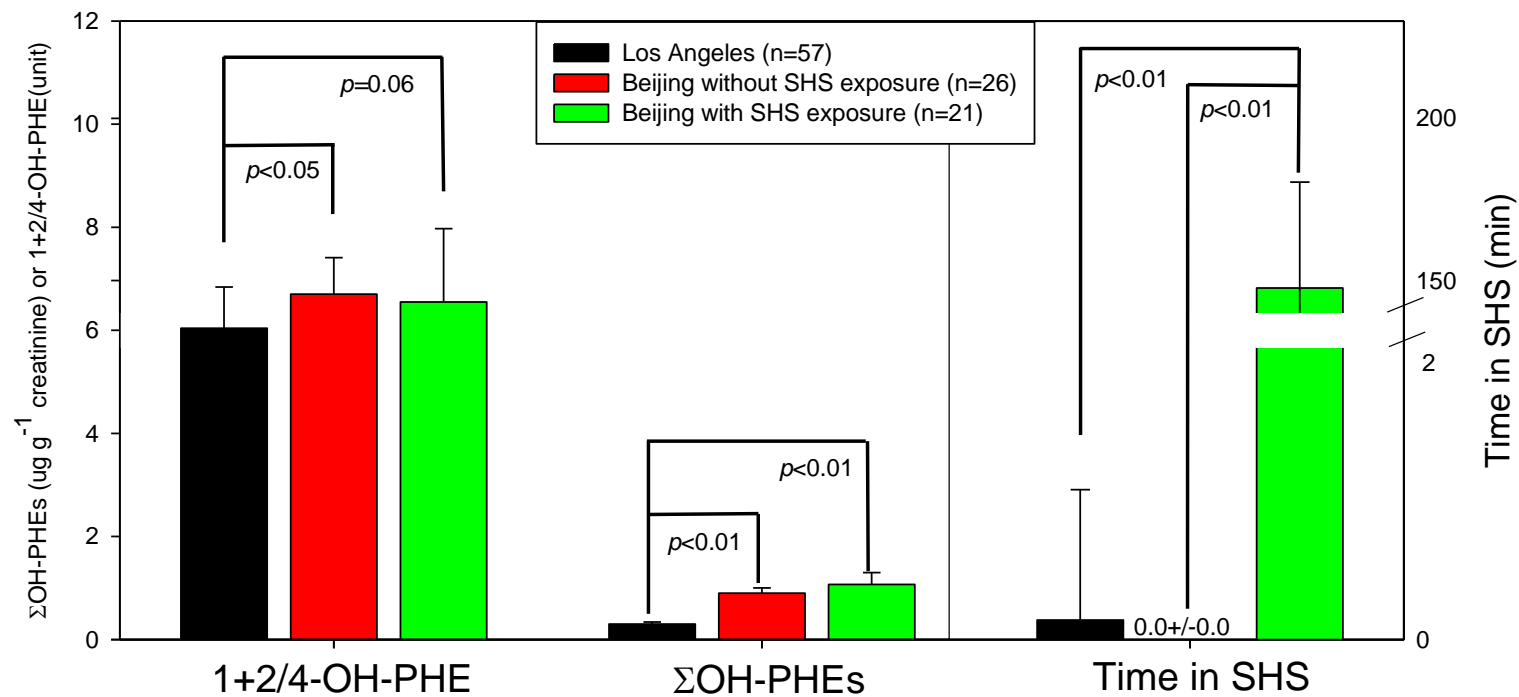

**Figure S3.** Comparison in 1+2/4-PHEs,  $\Sigma\text{OH-PHEs}$  and time in secondhand smokes (SHS) among population in Los Angeles, in Beijing without SHS exposure and in Beijing with SHS. Error bar indicates the standard error.  $p$ -value is calculated by Mann-Whitney U-test.

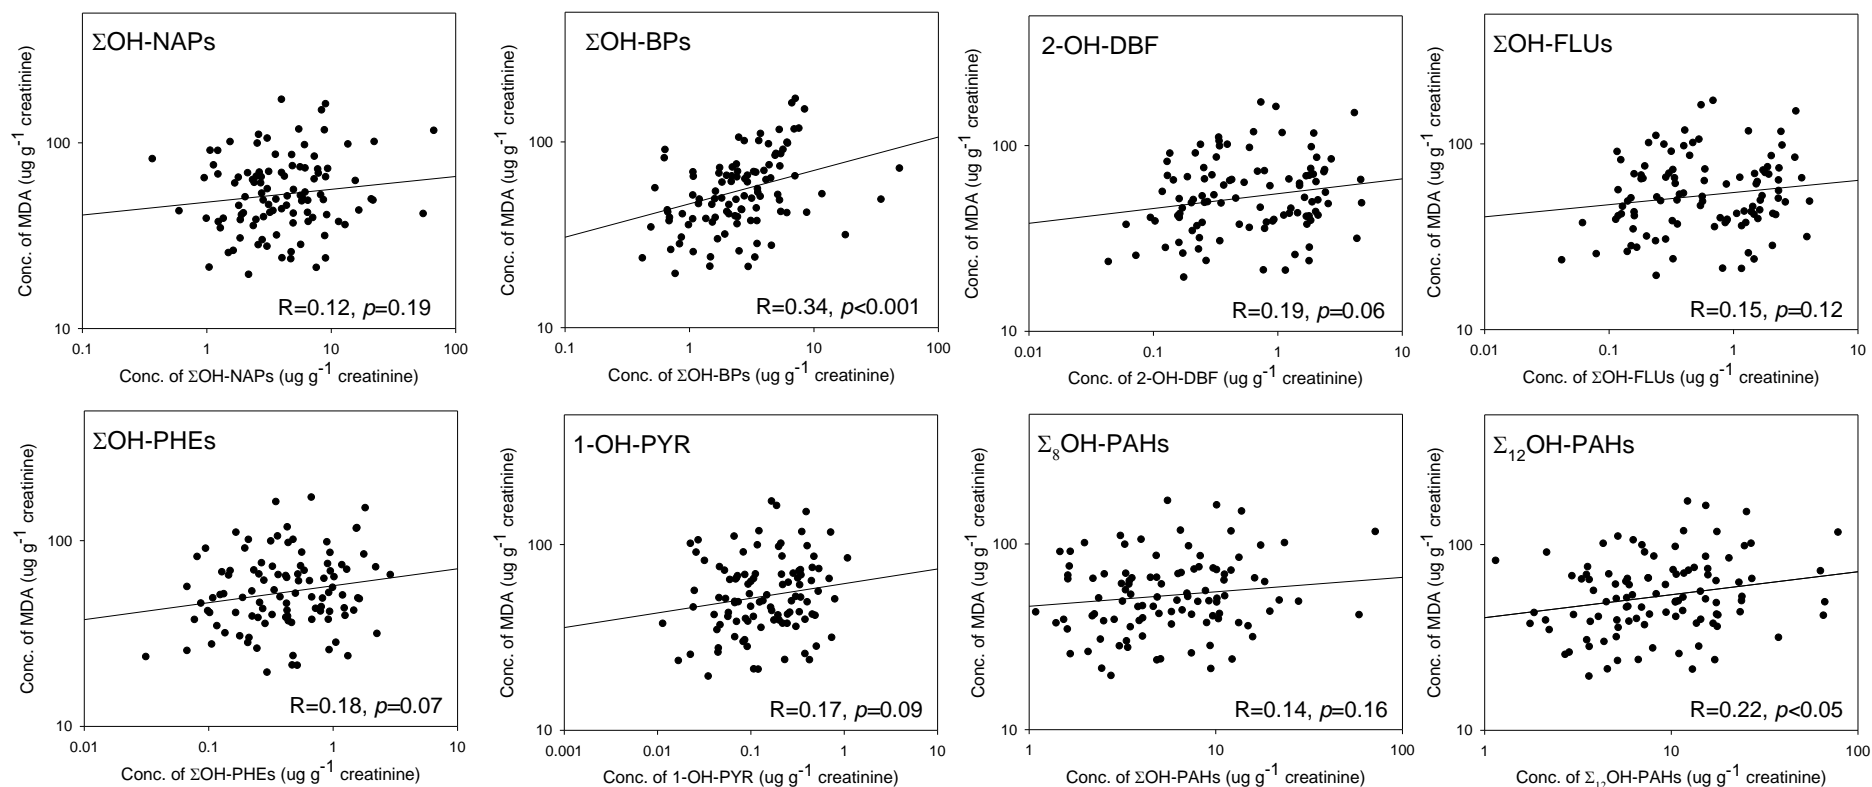

**Figure S4. Correlation between MDA and OH-PAHs in both cities.**  $\Sigma_8\text{OH-PAHs}$  sum of  $\Sigma\text{OH-NAPs}$ ,  $\Sigma\text{OH-FLUs}$ ,  $\Sigma\text{OH-PHEs}$ , 1-OH-PYR;  $\Sigma_{12}\text{OH-PAHs}$  sum of  $\Sigma_8\text{OH-PAHs}$ ,  $\Sigma\text{OH-BPs}$  and 2-OH-DBF.

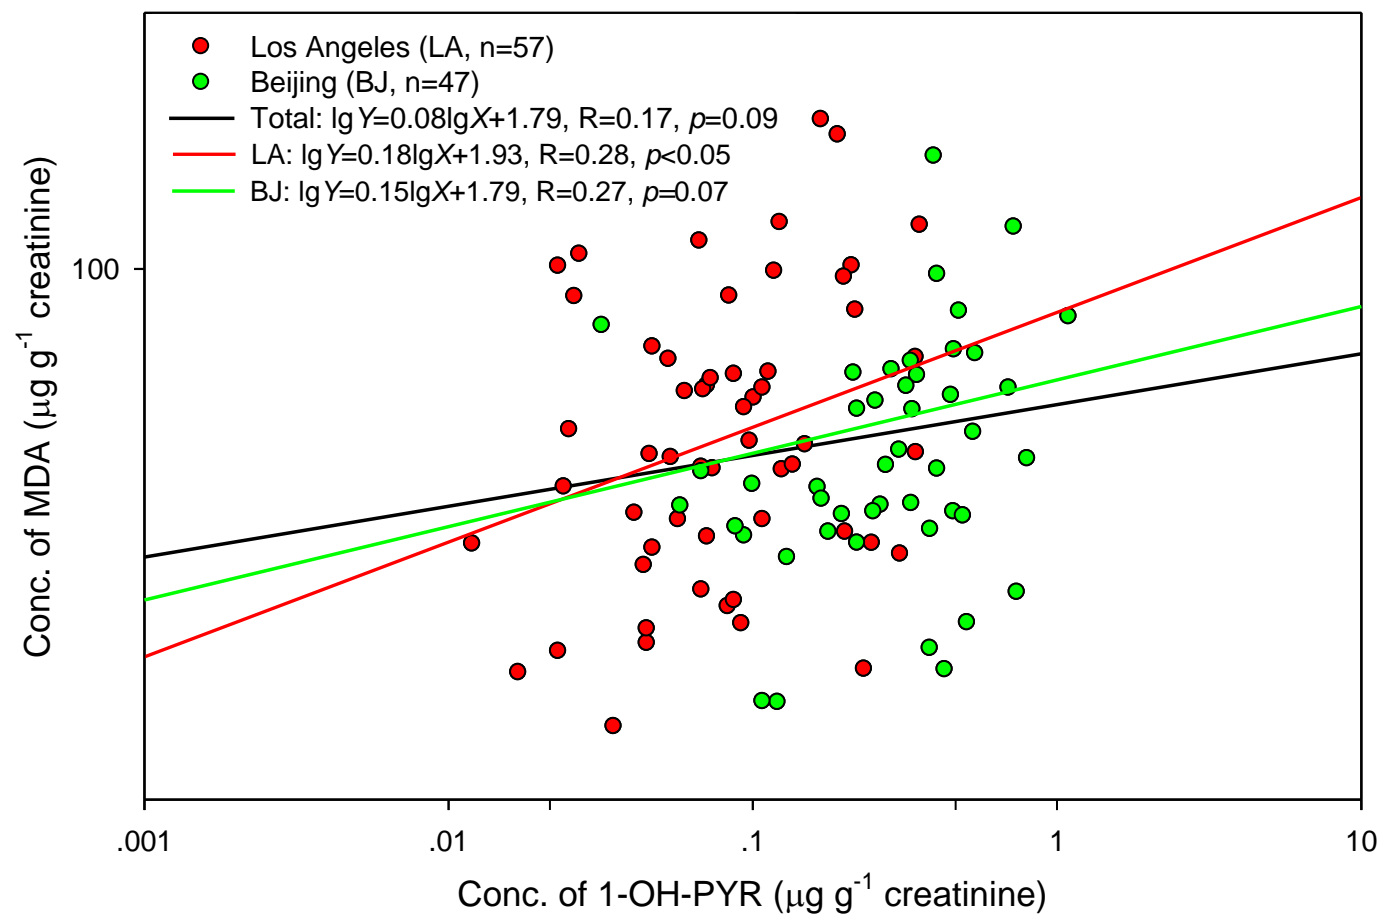

**Figure S5. Correlation between MDA and 1-OH-PYR in Los Angeles and Beijing**

## References:

- (1). Xia, Y.; Zhu, P.; Han, Y.; Lu, C.; Wang, S.; Gu, A.; Fu, G.; Zhao, R.; Song, L.; Wang, X., Urinary metabolites of polycyclic aromatic hydrocarbons in relation to idiopathic male infertility. *Hum. Reprod.* **2009**, *24*, (5), 1067--1074.
- (2). Sánchez-Guerra, M.; Pelallo-Martínez, N.; Díaz-Barriga, F.; Rothenberg, S. J.; Hernández-Cadena, L.; Faugeron, S.; Oropeza-Hernández, L. F.; Guaderrama-Díaz, M.; Quintanilla-Vega, B., Environmental polycyclic aromatic hydrocarbon (PAH) exposure and DNA damage in Mexican children. *Mutation Research/Genetic Toxicology and Environmental Mutagenesis* **2012**, *742*, (1), 66-71.
- (3). Han, X.; Zhou, N.; Cui, Z.; Ma, M.; Li, L.; Cai, M.; Li, Y.; Lin, H.; Li, Y.; Ao, L.; Others, Association between urinary polycyclic aromatic hydrocarbon metabolites and sperm DNA damage: a population study in Chongqing, China. *Environ. Health Persp.* **2011**, *119*, (5), 652.
- (4). Yang, Q. Y.; Qiu, X. H.; Li, R.; Ma, J.; Li, K. Q.; Li, G., Polycyclic aromatic hydrocarbon (PAH) exposure and oxidative stress for a rural population from the North China Plain. *Environ. Sci. Pollut. R.* **2015**, *22*, (3), 1760-1769.
- (5). Ruchirawat, M.; Settachan, D.; Navasumrit, P.; Tuntawiroon, J.; Autrup, H., Assessment of potential cancer risk in children exposed to urban air pollution in Bangkok, Thailand. *Toxicol. Lett.* **2007**, *168*, (3), 200-209.
- (6). Hofmann, J. N.; Liao, L. M.; Strickland, P. T.; Shu, X.; Yang, G.; Ji, B.; Li, H.; Rothman, N.; Kamangar, F.; Gao, Y.; Others, Polycyclic aromatic hydrocarbons: determinants of urinary 1-hydroxypyrene glucuronide concentration and risk of colorectal cancer in the Shanghai Women's Health Study. *Bmc Cancer* **2013**, *13*, (1), 282.
- (7). St. Helen, G.; Goniewicz, M. L.; Dempsey, D.; Wilson, M.; Jacob III, P.; Benowitz, N. L., Exposure and Kinetics of Polycyclic Aromatic Hydrocarbons (PAHs) in Cigarette Smokers. *Chem. Res. Toxicol.* **2012**, *25*, (4), 952--964.
- (8). Huang, H. B.; Lai, C. H.; Chen, G. W.; Lin, Y. Y.; Jaakkola, J.; Liou, S. H.; Wang, S. L., Traffic-Related Air Pollution and DNA Damage: A Longitudinal Study in Taiwanese Traffic Conductors. *PLOS ONE* **2012**, *7*, (e374125).
- (9). Viau, C.; Vyskočil, A.; Martel, L., Background urinary 1-hydroxypyrene levels in non-occupationally exposed individuals in the Province of Québec, Canada, and comparison with its excretion in workers exposed to PAH mixtures. *Sci. Total Environ.* **1995**, *163*, (1-3), 191-194.
- (10). Heudorf, U.; Angerer, J., Internal exposure to PAHs of children and adults living in homes with parquet flooring containing high levels of PAHs in the parquet glue. *Int. Arch. Occ. Env. Hea.* **2001**, *74*, (2), 91-101.
- (11). Grainger, J.; Huang, W.; Patterson Jr., D. G.; Turner, W. E.; Pirkle, J.; Caudill, S. P.; Wang, R. Y.; Needham, L. L.; Sampson, E. J., Reference range levels of polycyclic aromatic hydrocarbons in the US population by measurement of urinary monohydroxy metabolites. *Environ. Res.* **2006**, *100*, (3), 394-423.
- (12). Kim, H.; Cho, S. H.; Kang, J. W.; Kim, Y. D.; Nan, H. M.; Lee, C. H.; Lee, H.; Kawamoto, T., Urinary 1-hydroxypyrene and 2-naphthol concentrations in male

- Koreans. *Int. Arch. Occ. Env. Hea.* **2000**, *74*, (1), 59-62.
- (13). Cavanagh, J. E.; Brown, L.; Trought, K.; Kingham, S.; Epton, M. J., Elevated concentrations of 1-hydroxypyrene in schoolchildren during winter in Christchurch, New Zealand. *Sci. Total Environ.* **2007**, *374*, (1), 51-59.
- (14). Li, Z.; Sandau, C. D.; Romanoff, L. C.; Caudill, S. P.; Sjodin, A.; Needham, L. L.; Patterson Jr, D. G., Concentration and profile of 22 urinary polycyclic aromatic hydrocarbon metabolites in the US population. *Environ. Res.* **2008**, *107*, (3), 320--331.
- (15). Riojas-Rodriguez, H.; Schilman, A.; Marron-Mares, A. T.; Masera, O.; Li, Z.; Romanoff, L.; Sjo Din, A.; Rojas-Bracho, L.; Needham, L. L.; Romieu, I., Impact of the improved patsari biomass stove on urinary polycyclic aromatic hydrocarbon biomarkers and carbon monoxide exposures in rural mexican women. *Environ. Health Persp.* **2011**, *119*, (9), 1301.
- (16). Li, Z.; Sjo Din, A.; Romanoff, L. C.; horton, K.; Fitzgerald, C. L.; Eppler, A.; Aguilar-Villalobos, M.; Naehar, L. P., Evaluation of exposure reduction to indoor air pollution in stove intervention projects in Peru by urinary biomonitoring of polycyclic aromatic hydrocarbon metabolites. *Environ. Int.* **2011**, *37*, (7), 1157--1163.
- (17). Bieniek, G.; Others, Urinary naphthols as an indicator of exposure to naphthalene. *Scandinavian journal of work, environment \& health* **1997**, *23*, (6), 414--420.
- (18). Pesch, B.; Spickenheuer, A.; Kendzia, B.; Schindler, B. K.; Welge, P.; Marczyński, B.; Rihs, H.; Raulf-Heimsoth, M.; Angerer, J.; Brüning, T., Urinary metabolites of polycyclic aromatic hydrocarbons in workers exposed to vapours and aerosols of bitumen. *Arch. Toxicol.* **2011**, *85*, (1 Supplement), 29-39.
- (19). Bieniek, G., Aromatic and polycyclic hydrocarbons in air and their urinary metabolites in coke plant workers. *Am. J. Ind. Med.* **1998**, *34*, (5), 445-454.
- (20). Bouchard, M.; Normandin, L.; Gagnon, F.; Viau, C.; Dumas, P.; Gaudreau, E. R.; Tremblay, C., Repeated measures of validated and novel biomarkers of exposure to polycyclic aromatic hydrocarbons in individuals living near an aluminum plant in Quebec, Canada. *Journal of Toxicology and Environmental Health, Part A* **2009**, *72*, (23), 1534--1549.
- (21). Kuang, D.; Zhang, W.; Deng, Q.; Zhang, X.; Huang, K.; Guan, L.; Hu, D.; Wu, T.; Guo, H., Dose-response relationships of polycyclic aromatic hydrocarbons exposure and oxidative damage to DNA and lipid in coke oven workers. *Environ. Sci. Technol.* **2013**, *47*, (13), 7446--7456.
- (22). Bouchard, M. E. L.; Pinsonneault, L.; Tremblay, C.; Weber, J., Biological monitoring of environmental exposure to polycyclic aromatic hydrocarbons in subjects living in the vicinity of a creosote impregnation plant. *Int. Arch. Occ. Env. Hea.* **2001**, *74*, (7), 505--513.
- (23). Barraza-Villarreal, A.; Escamilla-Nuñez, M. C.; Schilman, A.; Hernandez-Cadena, L.; Li, Z.; Romanoff, L.; Sjödin, A.; Del Río-Navarro, B. E.; Díaz-Sanchez, D.; Díaz-Barriga, F., Lung Function, Airway Inflammation, and Polycyclic Aromatic Hydrocarbons Exposure in Mexican Schoolchildren: A Pilot Study. *J. Occup. Environ. Med.* **2014**, *56*, (4), 415-419.
- (24). Kamal, A.; Malik, R. N.; Martellini, T.; Cincinelli, A., PAH exposure



biomarkers are associated with clinico-chemical changes in the brick kiln workers in Pakistan. *Sci. Total Environ.* **2014**, *490*, 521-527.

(25). Rodrigues, E. G.; Smith, K.; Maule, A. L.; Sjodin, A.; Li, Z.; Romanoff, L.; Kelsey, K.; Proctor, S.; McClean, M. D., Urinary Polycyclic Aromatic Hydrocarbon (ho-PAH) Metabolite Concentrations and the Effect of GST Polymorphisms Among US Air Force Personnel Exposed to Jet Fuel. *J. Occup. Environ. Med.* **2014**, *56*, (5), 465-471.
